# Supplementary material for: Enhanced non-enzymatic glucose sensing based on porous ZIF-67 hollow nanoprisms
Source: Royal Society of Chemistry journal article supplement (doi:10.1039/d1nj01138c), 2021-01-01
Supplement: d1nj01138c1.pdf [file d1nj01138c1.pdf]

## Enhanced non-enzymatic glucose sensing based on porous ZIF-67 hollow nanoprisms

Qiwen Chen, Dandan Chu, Li Yan, Haichen Lai, Xue-Qiang Chu, Danhua Ge,\* Xiaojun Chen\*

College of Chemistry and Molecular Engineering, Nanjing Tech University,  
Nanjing, 211800, PR China.

Corresponding E-mail: [chenxj@njtech.edu.cn](mailto:chenxj@njtech.edu.cn)

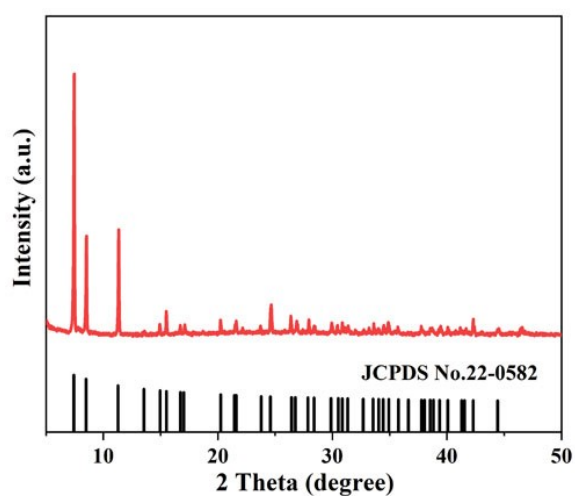

Fig. S1 XRD pattern of Co precursor.

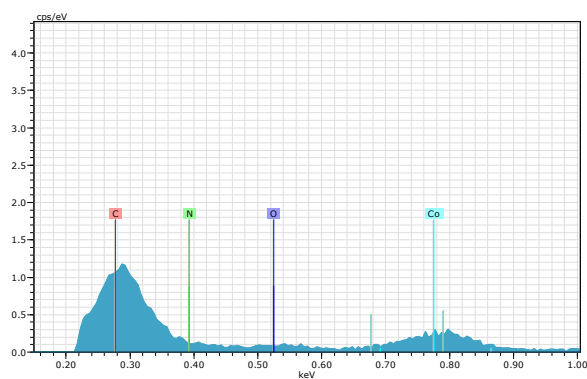

Fig. S2 EDS of the ZIF-67 HNPs.

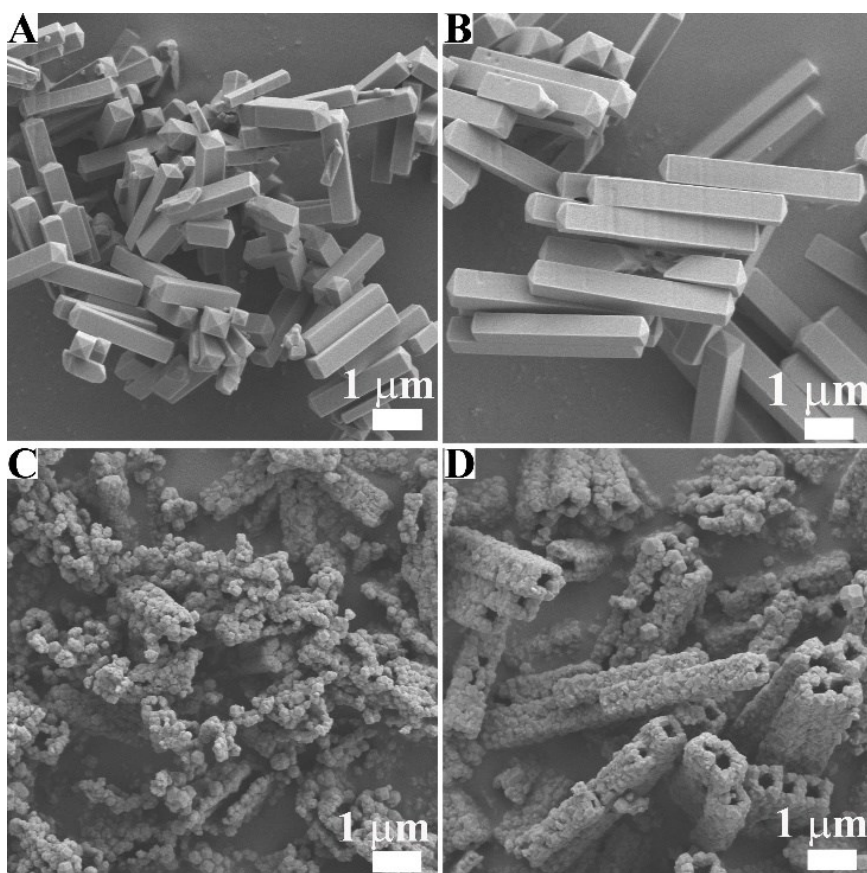

**Fig. S3** SEM images of Co-urea NPs produced with (A) 300 mg and (B) 480 mg of urea, respectively, and (C and D) the corresponding ZIF-67-1 and ZIF-67-2 HNPs.

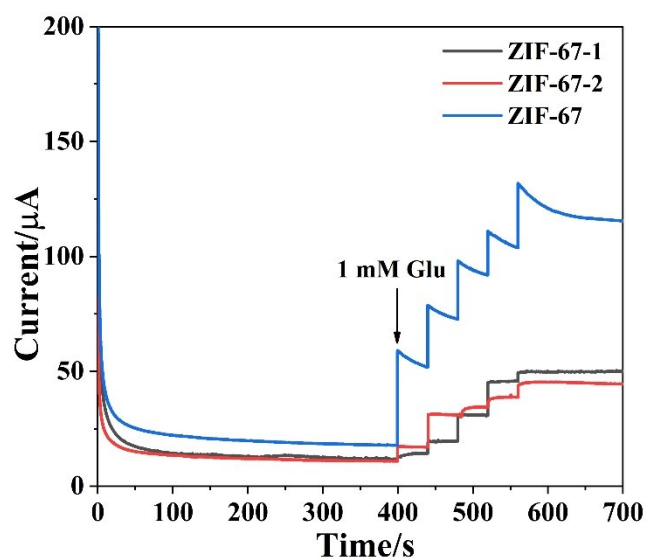

**Fig. S4** Chronoamperometric responses of ZIF-67, ZIF-67-1 and ZIF-67-2 HNPs towards the successive injection of 1 mM glucose solution, respectively.

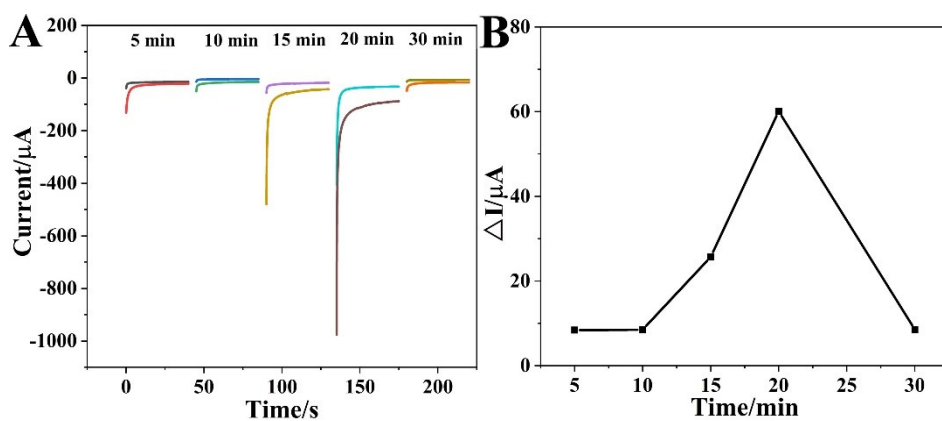

**Fig. S5** (A) Chronoamperometric catalytic responses of ZIF-67 HNPs obtained at different reaction time upon 1 mM glucose in 0.2 M NaOH. Scan rate: 50 mV s<sup>-1</sup>. (B) The corresponding results of different reaction time.

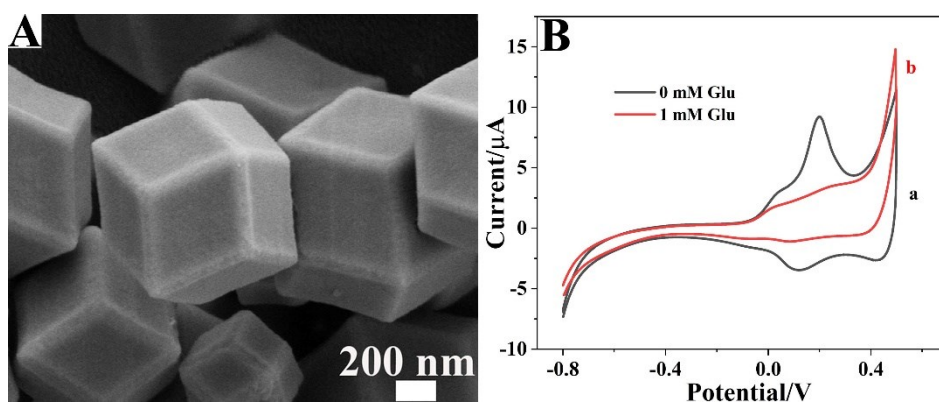

**Fig. S6** (A) SEM image of ZIF-67 dodecahedrons. (B) CVs of ZIF-67 dodecahedrons in the absence (a) and presence (b) of 1 mM glucose in 0.1 M NaOH. Scan rate: 50 mV s<sup>-1</sup>.

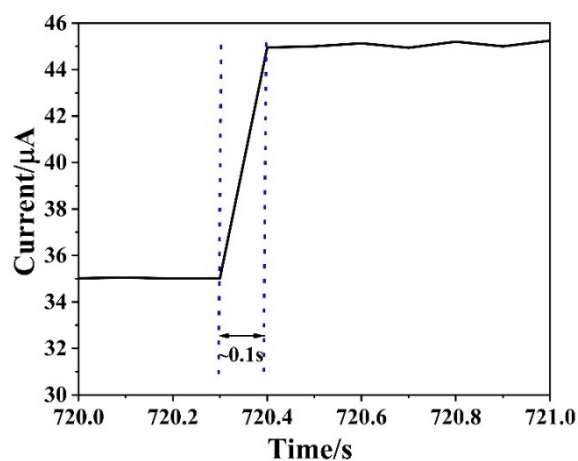

**Fig. S7** Enlarged chronoamperometric response of ZIF-67 HNPs/ITO.
